# Supplementary material for: CD4 occupancy triggers sequential pre-fusion conformational states of the HIV-1 envelope trimer with relevance for broadly neutralizing antibody activity
Source: PubMed Central journal article supplement (PMC6351000; doi:10.1371/journal.pbio.3000114), 2019-01-16

S3 Fig

CD4-IgG<sub>2</sub>

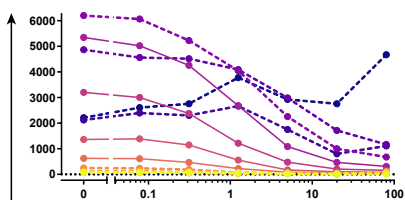

1-79

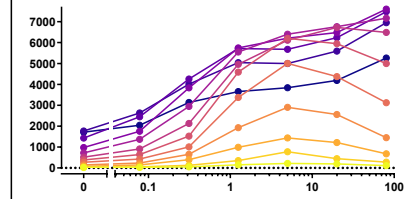

17b

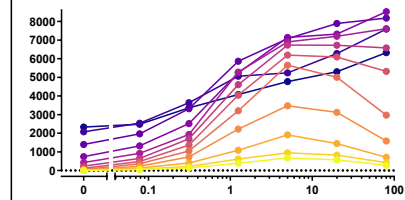

4B3

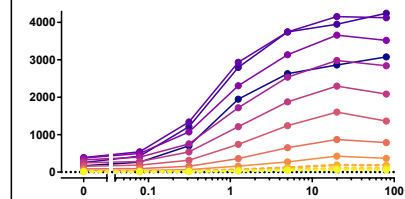

C34-IgG<sub>1</sub>

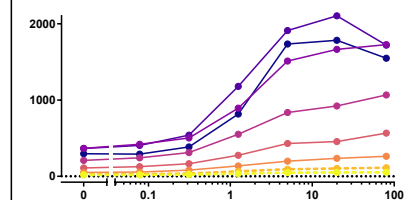

PGT145

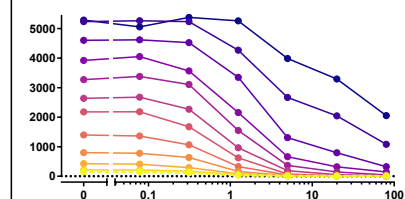

2G12

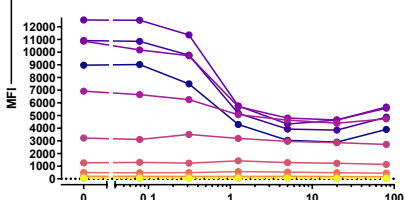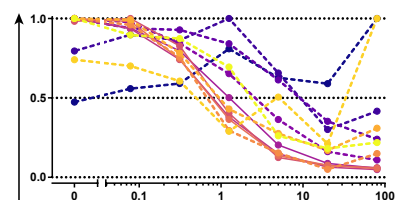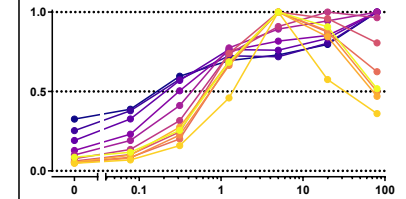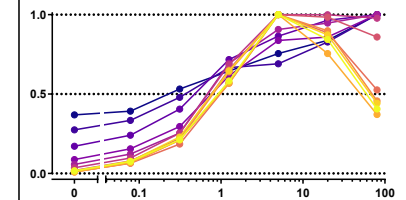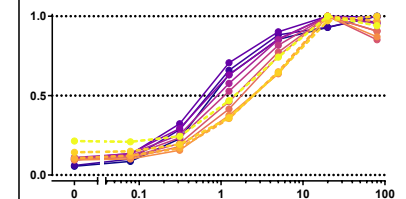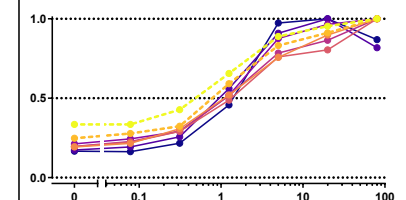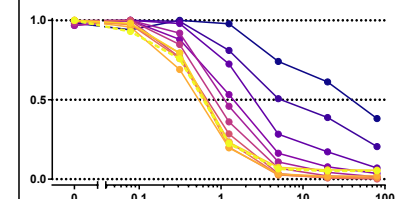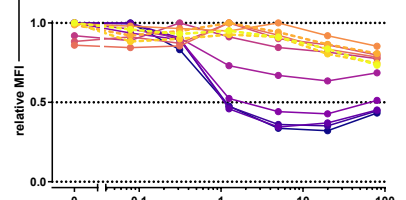

PGT128

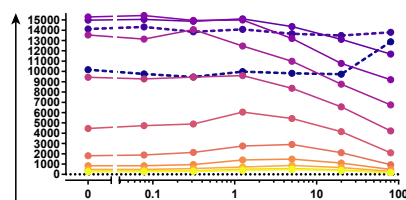

PGT121

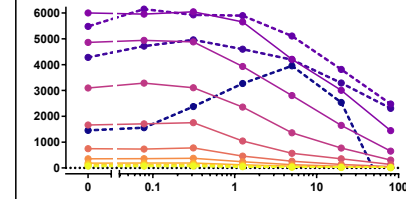

PGT135

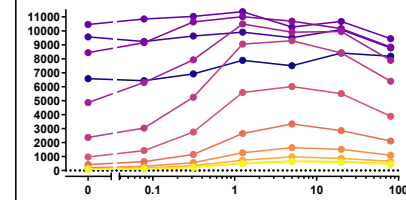

PGT151

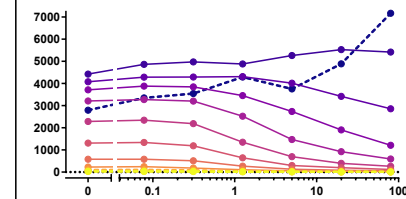

VRC34.01

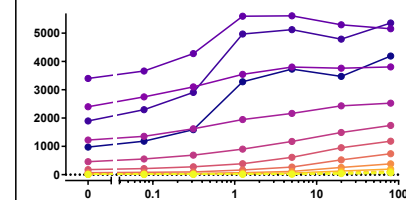

4E10

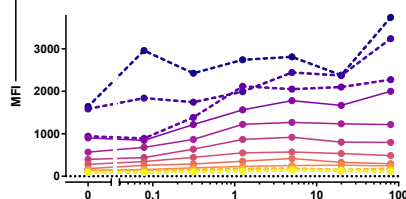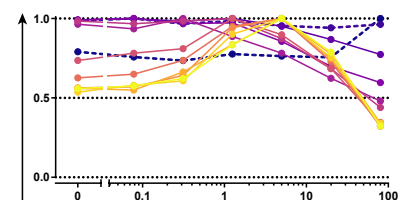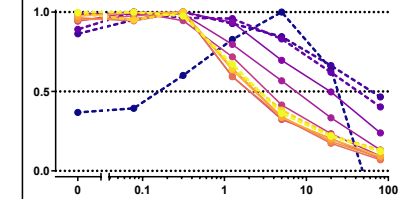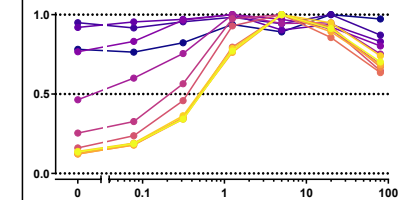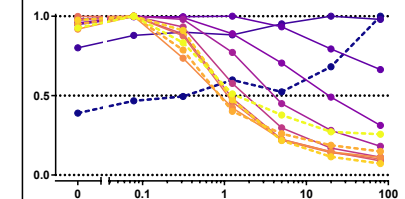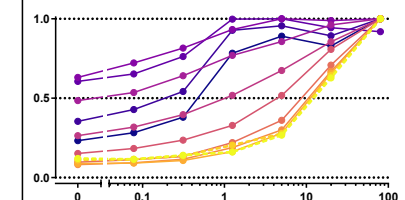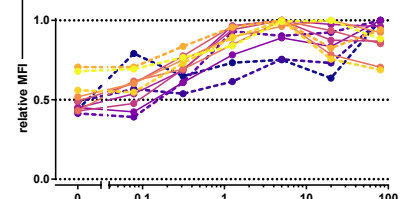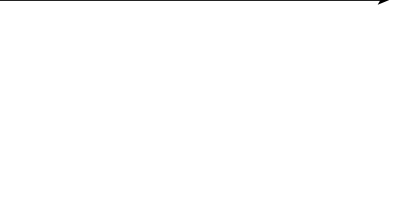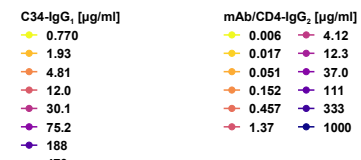

Supplement: pbio.3000114.s003.pdf [file pbio.3000114.s003.pdf]
