# Supplementary material for: CD4 occupancy triggers sequential pre-fusion conformational states of the HIV-1 envelope trimer with relevance for broadly neutralizing antibody activity
Source: PubMed Central journal article supplement (PMC6351000; doi:10.1371/journal.pbio.3000114), 2019-01-16
Supplement: pbio.3000114.s007.pdf [file pbio.3000114.s007.pdf]

S7 Fig

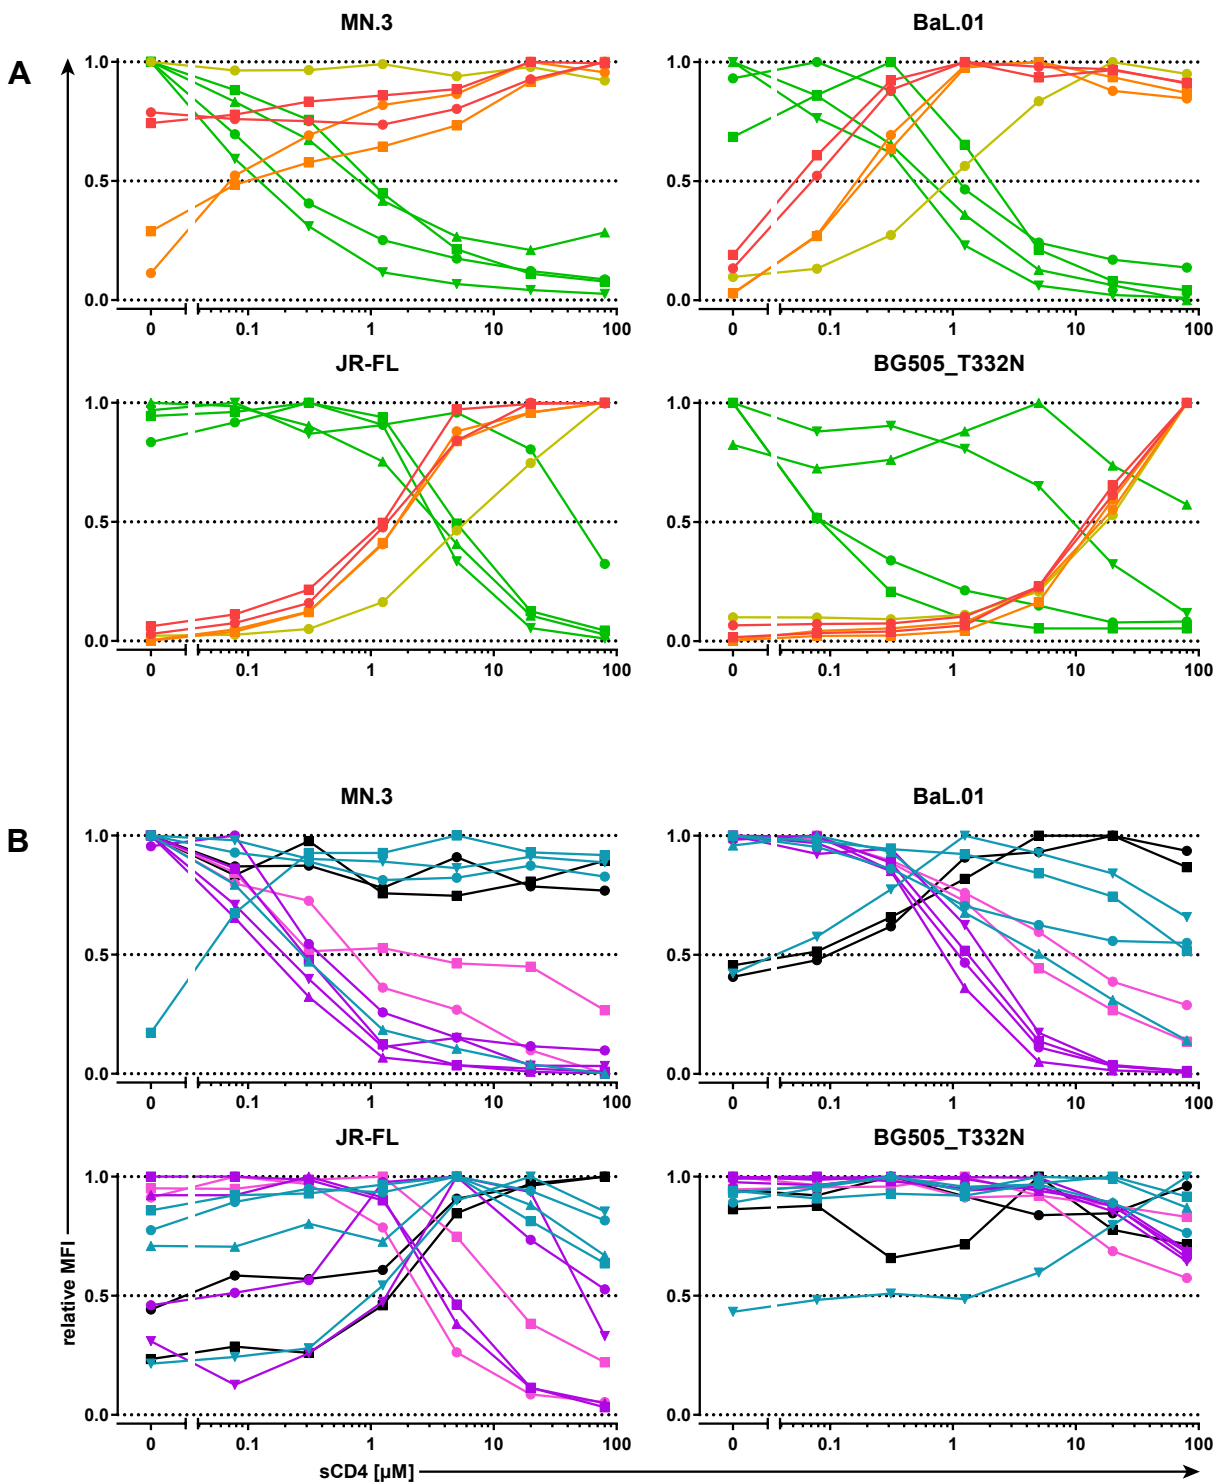

**wnAbs/nnAbs**

- 1-79 } V3 crown
- 447-52D } V3 crown
- 17b } CD4i
- 48d } CD4i
- 4B3 } cluster I

**CD4bs mAbs/CD4 analog**

- b6 } CD4bs
- b12 } CD4bs
- CD4-IgG<sub>2</sub> } CD4bs
- VRC01 } CD4bs

**bnAbs**

- 2G12 } V3 high-mannose patch
- PGT128 } V3 high-mannose patch
- PGT121 } V3 high-mannose patch
- PGT135 } V3 high-mannose patch
- PG9 } V2 apex
- PG16 } V2 apex
- PGT145 } V2 apex
- PGDM1400 } V2 apex
- 35O22 } subunit interface
- PGT151 } subunit interface
- 4E10 } MPER
- 10E8 } MPER
