# Supplementary material for: CD4 occupancy triggers sequential pre-fusion conformational states of the HIV-1 envelope trimer with relevance for broadly neutralizing antibody activity
Source: PubMed Central journal article supplement (PMC6351000; doi:10.1371/journal.pbio.3000114), 2019-01-16
Supplement: pbio.3000114.s008.pdf [file pbio.3000114.s008.pdf]

# S8 Fig

MN.3

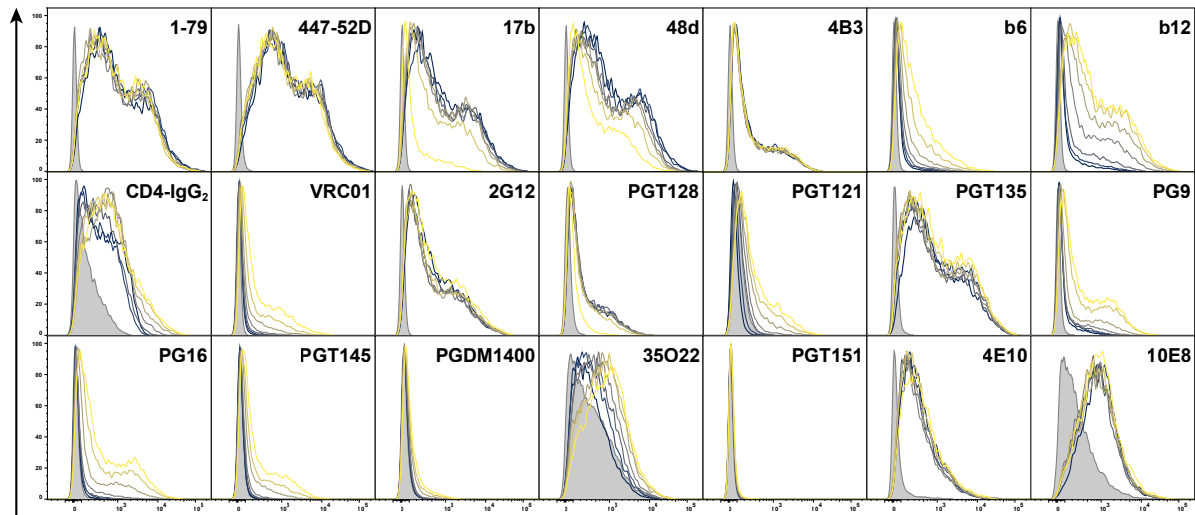

BaL.01

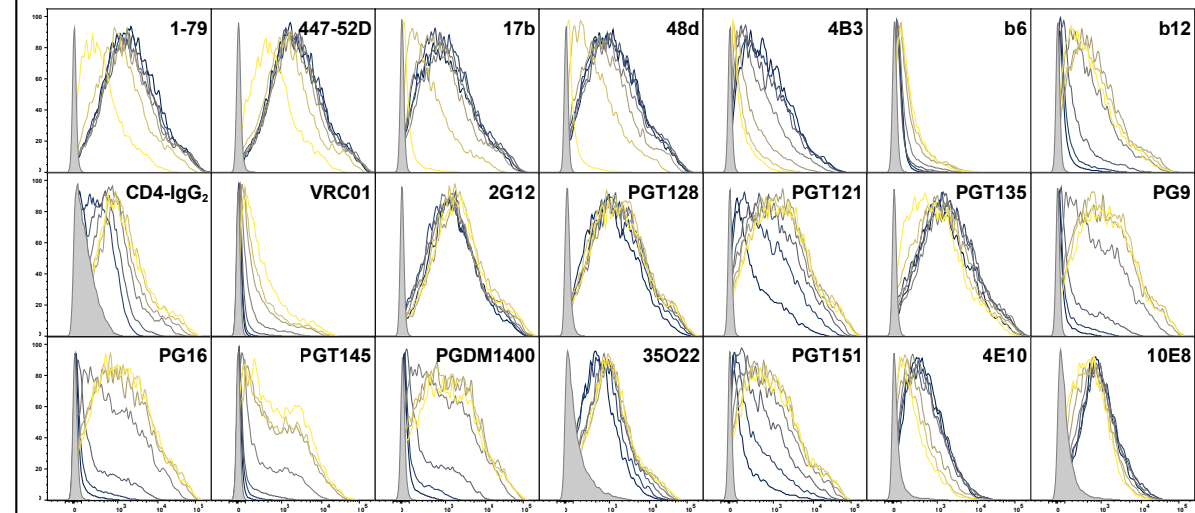

JR-FL

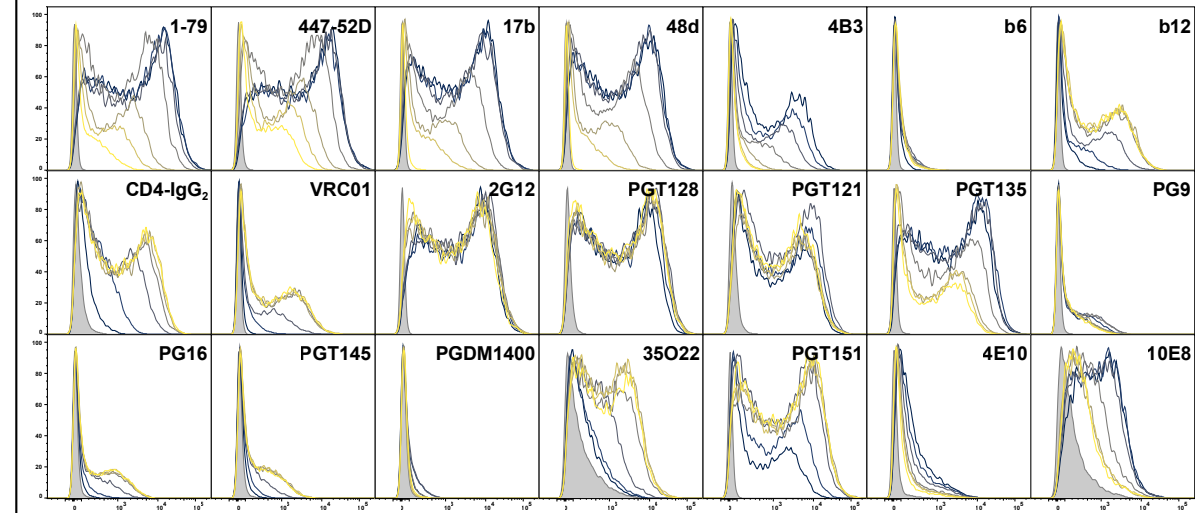

BG505\_ T332N

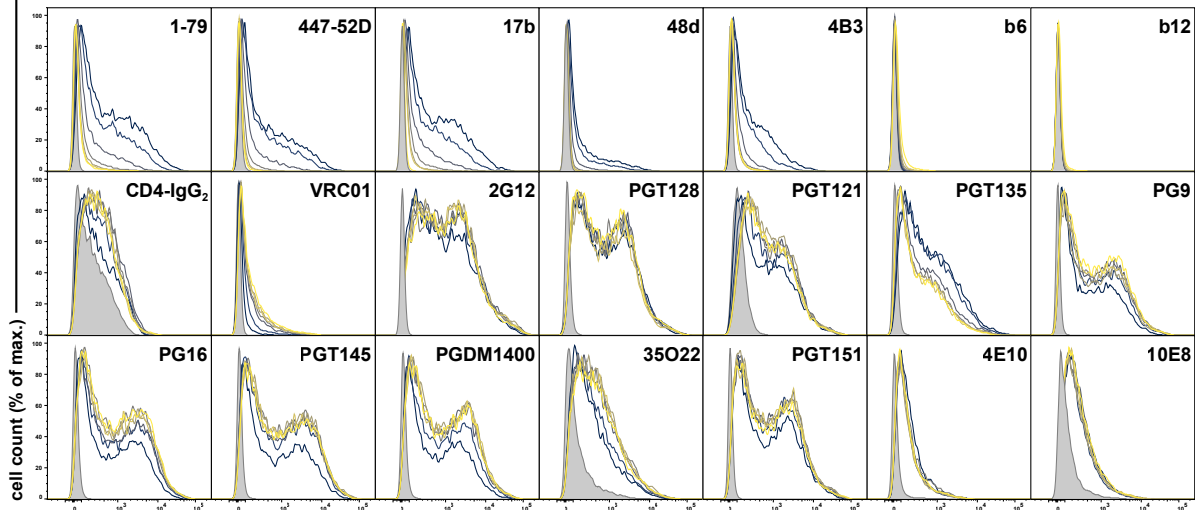

cell count (% of max.)

APC
