# Supplementary material for: CD4 occupancy triggers sequential pre-fusion conformational states of the HIV-1 envelope trimer with relevance for broadly neutralizing antibody activity
Source: PubMed Central journal article supplement (PMC6351000; doi:10.1371/journal.pbio.3000114), 2019-01-16

S9 Fig

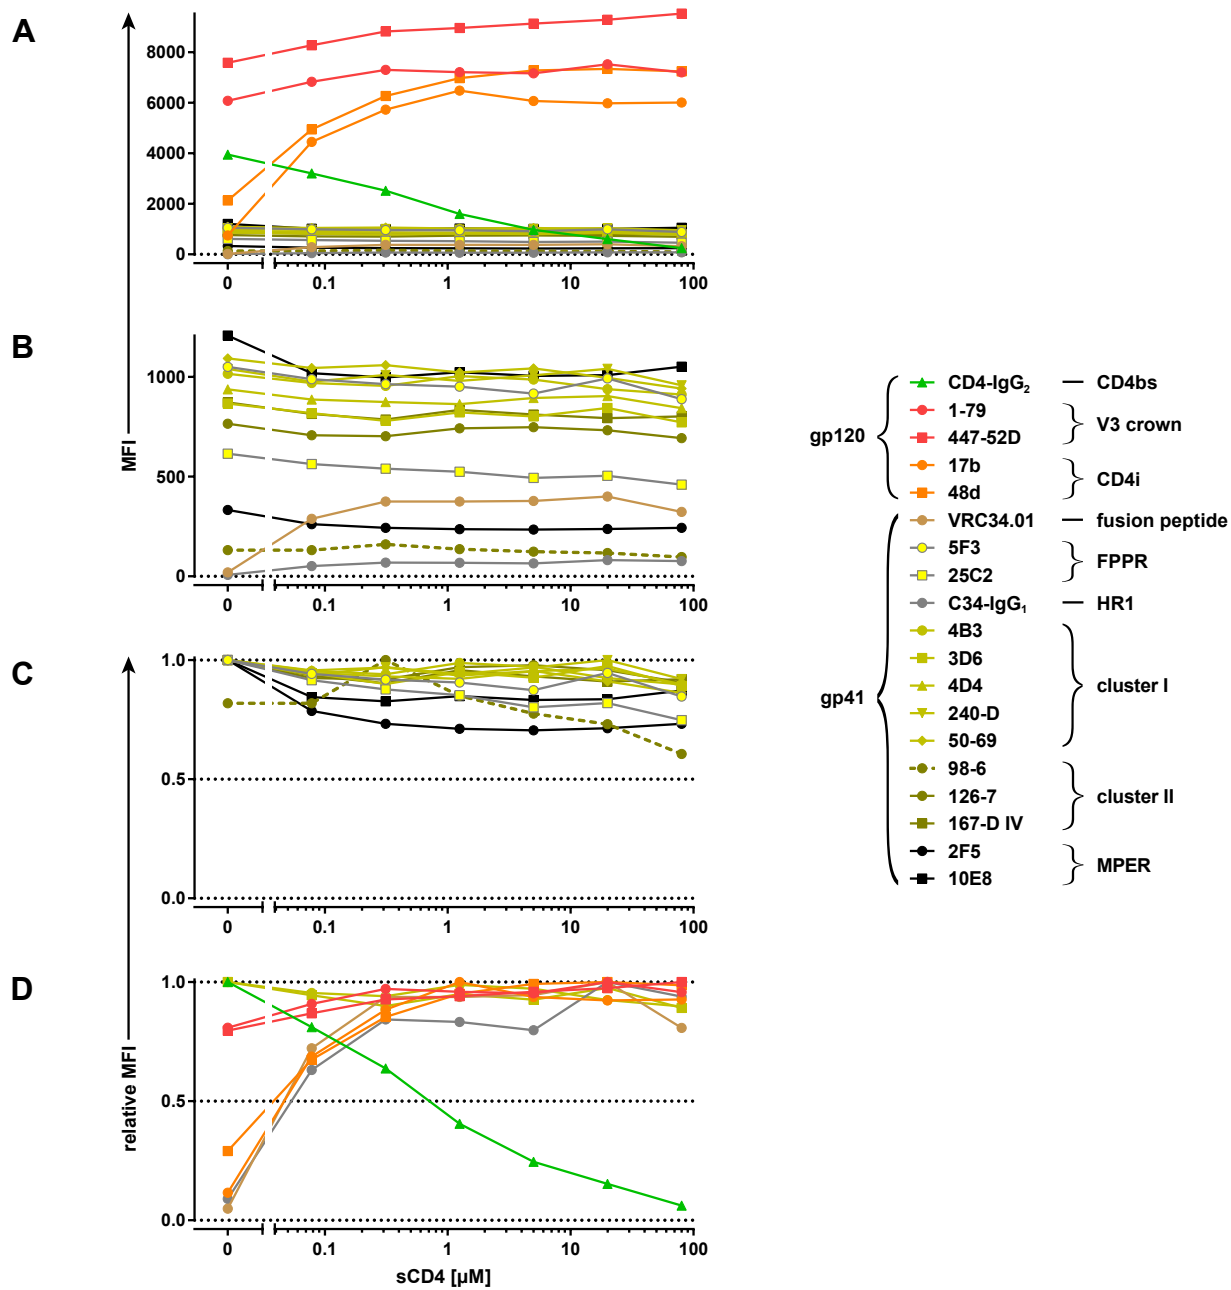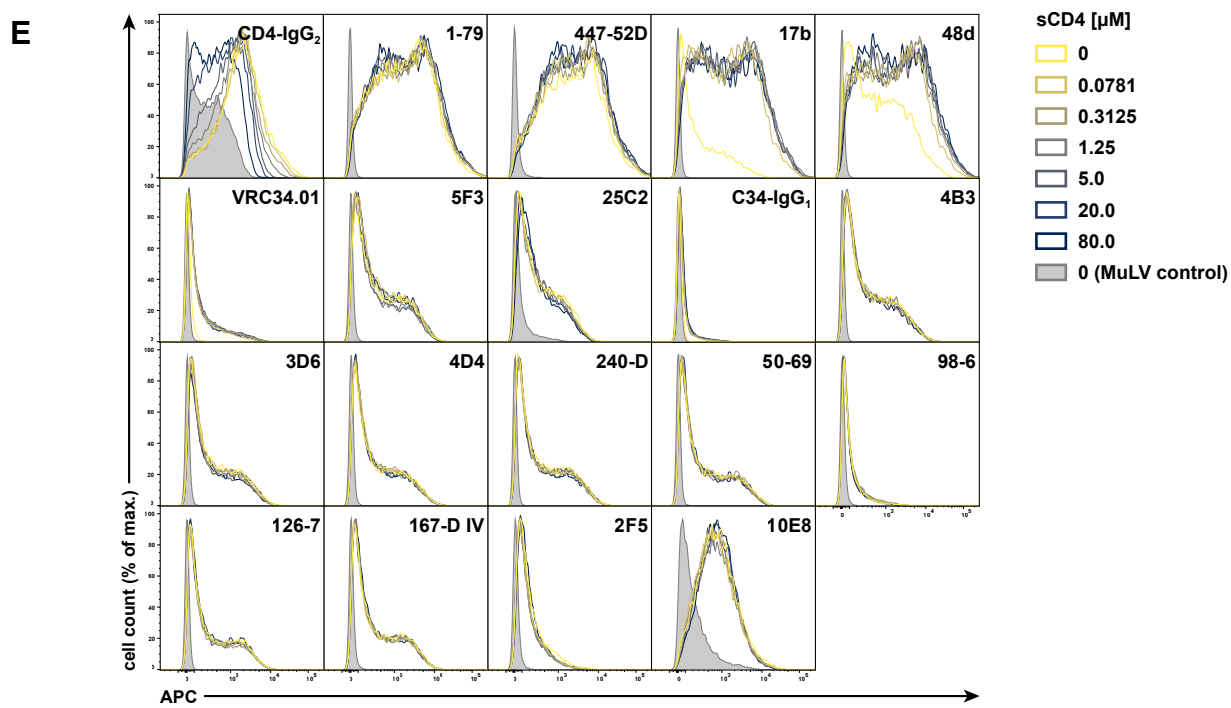

Supplement: pbio.3000114.s009.pdf [file pbio.3000114.s009.pdf]
