# Supplementary material for: CD4 occupancy triggers sequential pre-fusion conformational states of the HIV-1 envelope trimer with relevance for broadly neutralizing antibody activity
Source: PubMed Central journal article supplement (PMC6351000; doi:10.1371/journal.pbio.3000114), 2019-01-16
Supplement: pbio.3000114.s010.pdf [file pbio.3000114.s010.pdf]

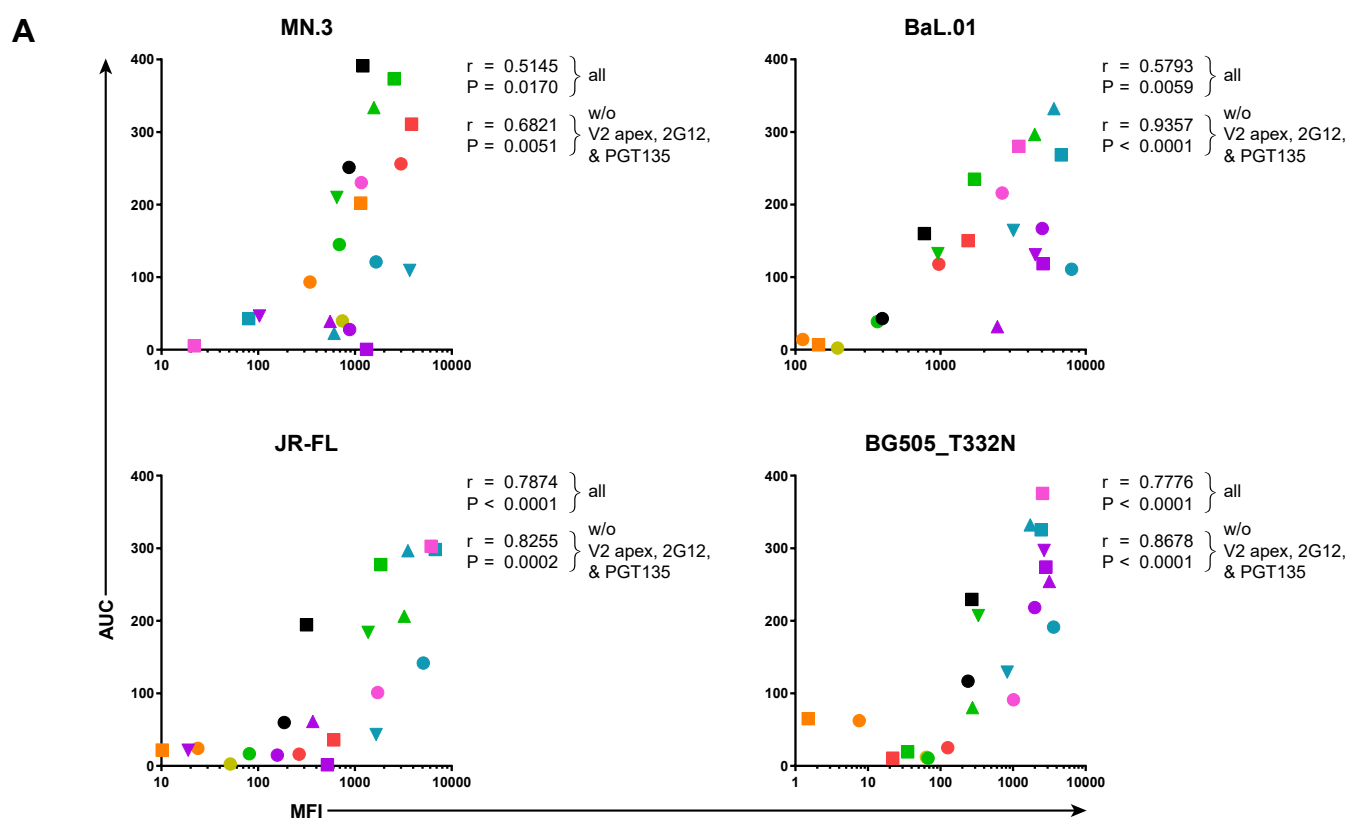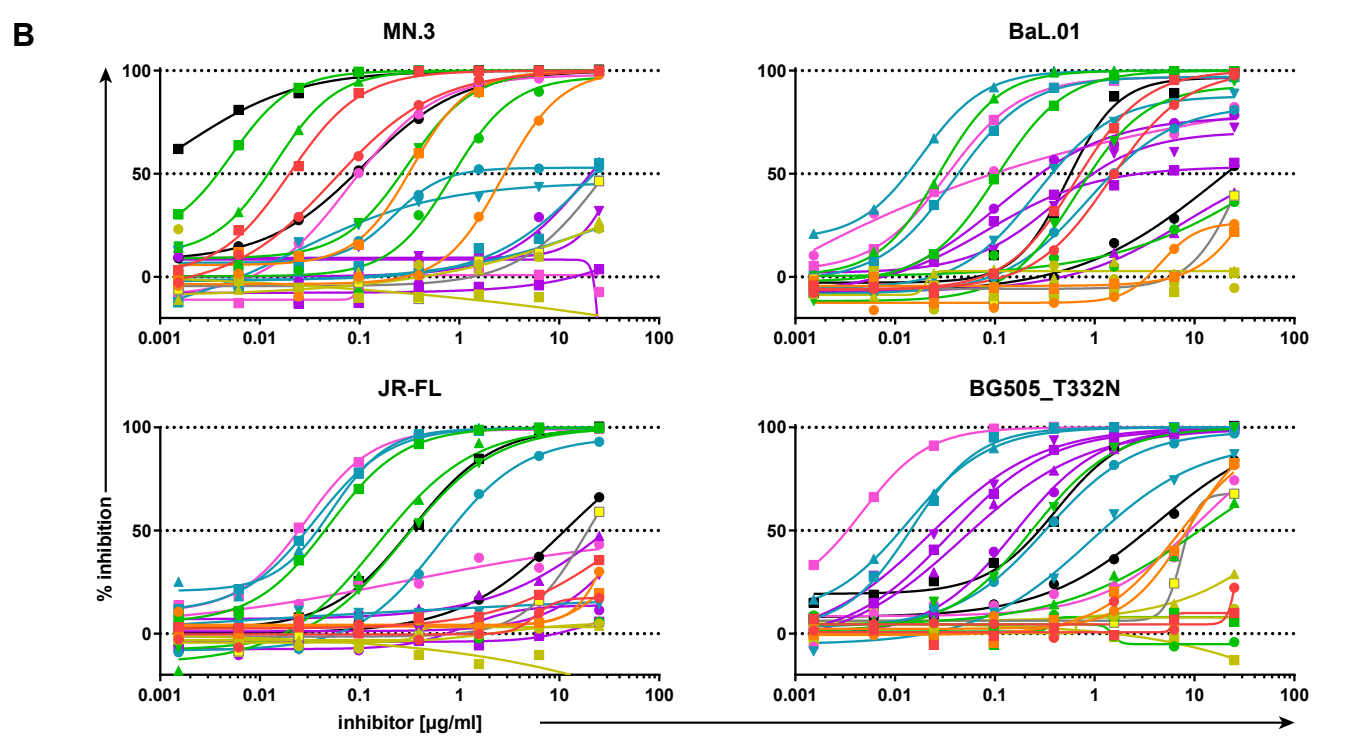

- | wnAbs/nnAbs | CD4bs mAbs/CD4 analog  | bnAbs      |
|-------------|------------------------|------------|
| ● 1-79      | ● b6                   | ● 2G12     |
| ■ 447-52D   | ■ b12                  | ■ PGT128   |
| ● 17b       | ▲ CD4-IgG <sub>2</sub> | ▲ PGT121   |
| ■ 48d       | ▼ VRC01                | ▼ PGT135   |
| ■ 25C2      |                        | ● PG9      |
| ● 4B3       |                        | ■ PG16     |
| ■ 3D6       |                        | ▲ PGT145   |
| ▲ 4D4       |                        | ▼ PGDM1400 |
|             |                        | ● 35O22    |
|             |                        | ■ PGT151   |
|             |                        | ● 4E10     |
|             |                        | ■ 10E8     |
- } V3 crown  
 } CD4i  
 } FPPR  
 } cluster I  
 } CD4bs  
 } V3 high-mannose patch  
 } V2 apex  
 } subunit interface  
 } MPER
