# Supplementary material for: CD4 occupancy triggers sequential pre-fusion conformational states of the HIV-1 envelope trimer with relevance for broadly neutralizing antibody activity
Source: PubMed Central journal article supplement (PMC6351000; doi:10.1371/journal.pbio.3000114), 2019-01-16
Supplement: pbio.3000114.s017.pdf [file pbio.3000114.s017.pdf]

S1 Table

| Inhibitor | Drug class | Target/Epitope            | Reference                                                              | Source                                                                                |
|-----------|------------|---------------------------|------------------------------------------------------------------------|---------------------------------------------------------------------------------------|
| 1-79      | Antibody   | gp120, V3 crown           | Scheid <i>et al.</i> 2009 Nature. 458(7238):636-40                     | M. Nussenzweig,<br>The Rockefeller University, New York, USA                          |
| 447-52D   | Antibody   | gp120, V3 crown           | Gorny <i>et al.</i> 1992 J Virol. 66(12):7538-42                       | H. Katinger and D. Katinger,<br>Polymun, Vienna, Austria                              |
| 17b       | Antibody   | gp120, CD4i               | Thali <i>et al.</i> 1993 J Virol. 67(7):3978-88                        | J. Robinson,<br>Tulane University Medical Center, New Orleans, USA                    |
| 48d       | Antibody   | gp120, CD4i               | Thali <i>et al.</i> 1993 J Virol. 67(7):3978-88                        | J. Robinson,<br>Tulane University Medical Center, New Orleans, USA                    |
| b6        | Antibody   | gp120, CD4bs              | Barbas III <i>et al.</i> 1992 Proc Natl Acad Sci U S A. 89(19):9339-43 | D. Burton,<br>The Scripps Research Institute, La Jolla, USA                           |
| b12       | Antibody   | gp120, CD4bs              | Barbas III <i>et al.</i> 1992 Proc Natl Acad Sci U S A. 89(19):9339-43 | D. Burton,<br>The Scripps Research Institute, La Jolla, USA                           |
| VRC01     | Antibody   | gp120, CD4bs              | Wu <i>et al.</i> 2010 Science. 329(5993):856-61                        | J. Mascola*,<br>Vaccine Research Center, National Institutes of Health, Bethesda, USA |
| 2G12      | Antibody   | gp120, high mannose patch | Trkola <i>et al.</i> 1996 J Virol. 70(2):1100-8                        | H. Katinger and D. Katinger,<br>Polymun, Vienna, Austria                              |
| PGT128    | Antibody   | gp120, high mannose patch | Walker <i>et al.</i> 2011 Nature. 477(7365):466-70                     | D. Burton,<br>The Scripps Research Institute, La Jolla, USA                           |
| PGT121    | Antibody   | gp120, high mannose patch | Walker <i>et al.</i> 2011 Nature. 477(7365):466-70                     | D. Burton,<br>The Scripps Research Institute, La Jolla, USA                           |
| PGT135    | Antibody   | gp120, high mannose patch | Walker <i>et al.</i> 2011 Nature. 477(7365):466-70                     | D. Burton,<br>The Scripps Research Institute, La Jolla, USA                           |
| PG9       | Antibody   | gp120, trimer apex        | Walker <i>et al.</i> 2009 Science. 326(5950):285-9                     | D. Burton,<br>The Scripps Research Institute, La Jolla, USA                           |
| PG16      | Antibody   | gp120, trimer apex        | Walker <i>et al.</i> 2009 Science. 326(5950):285-9                     | D. Burton,<br>The Scripps Research Institute, La Jolla, USA                           |
| PGT145    | Antibody   | gp120, trimer apex        | Walker <i>et al.</i> 2011 Nature. 477(7365):466-70                     | D. Burton,<br>The Scripps Research Institute, La Jolla, USA                           |
| PGDM1400  | Antibody   | gp120, trimer apex        | Sok <i>et al.</i> 2014 Proc Natl Acad Sci U S A. 111(49):17624-9       | D. Burton,<br>The Scripps Research Institute, La Jolla, USA                           |
| 35O22     | Antibody   | gp120/gp41 interface      | Huang <i>et al.</i> 2014 Nature. 515(7525):138-42                      | J. Mascola*,<br>Vaccine Research Center, National Institutes of Health, Bethesda, USA |
| PGT151    | Antibody   | gp120/gp41 interface      | Falkowska <i>et al.</i> 2014 Immunity. 40(5):657-68                    | D. Burton,<br>The Scripps Research Institute, La Jolla, USA                           |
| VRC34.01  | Antibody   | gp41 fusion peptide       | Kong <i>et al.</i> 2016 Science. 352(6287):828-33                      | J. Mascola,<br>Vaccine Research Center, National Institutes of Health, Bethesda, USA  |
| 5F3       | Antibody   | gp41 FPPR                 | Buchacher <i>et al.</i> 1994 AIDS Res Hum Retroviruses. 10(4):359-69   | H. Katinger and D. Katinger,<br>Polymun, Vienna, Austria                              |
| 25C2      | Antibody   | gp41 FPPR                 | Buchacher <i>et al.</i> 1994 AIDS Res Hum Retroviruses. 10(4):359-69   | H. Katinger and D. Katinger,<br>Polymun, Vienna, Austria                              |
| 3D6       | Antibody   | gp41 cluster I            | Buchacher <i>et al.</i> 1994 AIDS Res Hum Retroviruses. 10(4):359-69   | H. Katinger and D. Katinger,<br>Polymun, Vienna, Austria                              |

**S1 Table**

|                                                                      |                             |                 |                                                                       |                                                                                                                        |
|----------------------------------------------------------------------|-----------------------------|-----------------|-----------------------------------------------------------------------|------------------------------------------------------------------------------------------------------------------------|
| <b>4B3</b>                                                           | Antibody                    | gp41 cluster I  | Buchacher <i>et al.</i> 1994 AIDS Res Hum Retroviruses. 10(4):359-69  | H. Katinger and D. Katinger, Polymun, Vienna, Austria                                                                  |
| <b>4D4</b>                                                           | Antibody                    | gp41 cluster I  | Buchacher <i>et al.</i> 1994 AIDS Res Hum Retroviruses. 10(4):359-69  | H. Katinger and D. Katinger, Polymun, Vienna, Austria                                                                  |
| <b>240-D</b>                                                         | Antibody                    | gp41 cluster I  | Xu <i>et al.</i> 1991 J Virol. 65(9):4832-8                           | S. Zolla-Pazner*, Mount Sinai School of Medicine, New York, USA                                                        |
| <b>50-69</b>                                                         | Antibody                    | gp41 cluster I  | Xu <i>et al.</i> 1991 J Virol. 65(9):4832-8                           | S. Zolla-Pazner*, Mount Sinai School of Medicine, New York, USA                                                        |
| <b>98-6</b>                                                          | Antibody                    | gp41 cluster II | Xu <i>et al.</i> 1991 J Virol. 65(9):4832-8                           | S. Zolla-Pazner*, Mount Sinai School of Medicine, New York, USA                                                        |
| <b>126-7</b>                                                         | Antibody                    | gp41 cluster II | Xu <i>et al.</i> 1991 J Virol. 65(9):4832-8                           | S. Zolla-Pazner*, Mount Sinai School of Medicine, New York, USA                                                        |
| <b>167-D IV</b>                                                      | Antibody                    | gp41 cluster II | Xu <i>et al.</i> 1991 J Virol. 65(9):4832-8                           | S. Zolla-Pazner*, Mount Sinai School of Medicine, New York, USA                                                        |
| <b>2F5</b>                                                           | Antibody                    | gp41, MPER      | Buchacher <i>et al.</i> 1994 AIDS Res Hum Retroviruses. 10(4):359-69  | H. Katinger and D. Katinger, Polymun, Vienna, Austria                                                                  |
| <b>4E10</b>                                                          | Antibody                    | gp41, MPER      | Stiegler <i>et al.</i> 2001 AIDS Res Hum Retroviruses. 17(18):1757-65 | H. Katinger and D. Katinger, Polymun, Vienna, Austria                                                                  |
| <b>10E8</b>                                                          | Antibody                    | gp41, MPER      | Huang <i>et al.</i> 2012 Nature. 491(7424):406-12                     | M. Connors*, National Institute of Allergy and Infectious Diseases, NIH, Bethesda, USA                                 |
| <b>C34</b>                                                           | HR2 mimic, fusion inhibitor | gp41, HR1       | Chan <i>et al.</i> 1998 Proc Natl Acad Sci U S A. 95(26): 15613–15617 | Purchased from AnaSpec Inc.                                                                                            |
| <b>C34-IgG<sub>1</sub></b>                                           | C34-antibody chimera        | gp41, HR1       | Si <i>et al.</i> 2004 Proc Natl Acad Sci U S A. 101(14):5036-41       | A. Herschhorn and J. Sodroski, Department of Immunology Cancer and Virology, Dana-Farber Cancer Institute, Boston, USA |
| <b>CD4-IgG<sub>2</sub></b>                                           | CD4-antibody chimera        | gp120, CD4bs    | Allaway <i>et al.</i> 1995 AIDS Res Hum Retroviruses. 11(5):533-9     | W. Olson*, Progenics Pharmaceuticals Inc.                                                                              |
| <b>sCD4</b>                                                          | Soluble CD4 protein         | gp120, CD4bs    | This study                                                            | Produced in <i>E. coli</i> , see Material and methods                                                                  |
| * Through the NIH AIDS Reagent Program, Division of AIDS, NIAID, NIH |                             |                 |                                                                       |                                                                                                                        |
