# Supplementary material for: CD4 occupancy triggers sequential pre-fusion conformational states of the HIV-1 envelope trimer with relevance for broadly neutralizing antibody activity
Source: PubMed Central journal article supplement (PMC6351000; doi:10.1371/journal.pbio.3000114), 2019-01-16
Supplement: pbio.3000114.s018.pdf [file pbio.3000114.s018.pdf]

**S2 Table**

| Plasmid                                                                                                                                                                                                                                                                                           | Description                                                                          | Cloning vector        | Reference                                         | Source                                                                             |
|---------------------------------------------------------------------------------------------------------------------------------------------------------------------------------------------------------------------------------------------------------------------------------------------------|--------------------------------------------------------------------------------------|-----------------------|---------------------------------------------------|------------------------------------------------------------------------------------|
| <b>MN.3</b>                                                                                                                                                                                                                                                                                       | MN.3 Env expression plasmid                                                          | unknown               | Burioni <i>et al.</i> 2008 PLoS One. 3(10):e3423  | J. Mascola, Vaccine Research Center, National Institutes of Health, Bethesda, USA  |
| <b>BaL.01</b>                                                                                                                                                                                                                                                                                     | BaL.01 Env expression plasmid                                                        | pcDNA3.1D/V5-His-TOPO | Li <i>et al.</i> 2006 J Virol. 80(3):1414-26      | J. Mascola*, Vaccine Research Center, National Institutes of Health, Bethesda, USA |
| <b>BaL.01 SOS**</b>                                                                                                                                                                                                                                                                               | BaL.01 SOS Env expression plasmid                                                    | pcDNA3.1D/V5-His-TOPO | Li <i>et al.</i> 2006 J Virol. 80(3):1414-26      | J. Mascola*, Vaccine Research Center, National Institutes of Health, Bethesda, USA |
| <b>JR-FL</b>                                                                                                                                                                                                                                                                                      | JR-FL Env expression plasmid                                                         | pcDNA3.1/V5-His-TOPO  | Rusert <i>et al.</i> 2009 AIDS. 23(11):1319-27    | N/A                                                                                |
| <b>BG505_T332N**</b>                                                                                                                                                                                                                                                                              | BG505.W6M.ENV.C2_T332N Env expression plasmid                                        | pcDNA3.1/V5-His-TOPO  | Wu <i>et al.</i> 2006 J Virol. 80(2):835-44       | Julie Overbaugh*, Fred Hutchinson Cancer Research Center, Seattle, USA             |
| <b>pCMV-rev</b>                                                                                                                                                                                                                                                                                   | HIV-1 Rev expression plasmid                                                         | pCMV                  | Lewis <i>et al.</i> 1990 J Virol. 64(4):1690-7    | M. Hammar skjöld and D. Rekosh*, The Scripps Research Institute, La Jolla, USA     |
| <b>pNL-lucAM</b>                                                                                                                                                                                                                                                                                  | Partial $\Delta env$ HIV-1 pseudotyping vector with firefly luciferase reporter gene | pNL4-3                | Pugach <i>et al.</i> 2007 Virology. 361(1):212-28 | A. Marozsan and J. Moore, Weill Medical College, Cornell University, New York, USA |
| <b>sCD4-183_avi_his</b>                                                                                                                                                                                                                                                                           | Recombinant soluble CD4 expression plasmid                                           | pET-32a(+)            | This study                                        | N/A                                                                                |
| <b>pBirAcm</b>                                                                                                                                                                                                                                                                                    | BirA biotin ligase expression plasmid                                                | pACYC-184             |                                                   | Avidity LLC                                                                        |
| <p>* Through the NIH AIDS Reagent Program, Division of AIDS, NIAID, NIH</p> <p>** The SOS mutations (A501C/T605C) and the T332N mutation was introduced with QuikChange II XL Site-Directed Mutagenesis Kit (Agilent Technologies, Santa Clara, USA) according to manufacturer's instructions</p> |                                                                                      |                       |                                                   |                                                                                    |
